# Supplementary material for: Improvement in White Matter Tract Reconstruction with Constrained Spherical Deconvolution and Track Density Mapping in Low Angular Resolution Data: A Pediatric Study and Literature Review
Source: PubMed Central journal article supplement (PMC5582070; doi:10.3389/fped.2017.00182), 2017-08-30
Supplement: table_1.pdf [file table_1.pdf]

***Supplementary Material:***  
**Improvement of white matter tract reconstruction with constrained spherical deconvolution and track-density mapping in low angular resolution data: a pediatric study and literature review**

**Benedetta Toselli \***, Domenico Tortora, Mariasavina Severino, Gabriele Arnulfo, Andrea Canessa, Giovanni Morana, Andrea Rossi and Marco Massimo Fato

\*Correspondence:  
Benedetta Toselli  
viale Causa 13  
16145 Genova (IT)  
+39 0103532789  
benedetta.toselli@dibris.unige.it

## **1 SUPPLEMENTARY TABLES AND FIGURES**

**Supplementary Table 1:** Average scores for whole-brain CSD-PT tractograms obtained with different values of FOD amplitude threshold (0.1, 0.2, 0.3 and 0.4) and maximum angle between tracking steps (10°, 30°, 50°, 70°, 90°). For visualization purposes, a dash (“-”) marks cells where the score frequency was 0.0%.

| Max angle | FOD amplitude | Score frequency |       |       |       |       |
|-----------|---------------|-----------------|-------|-------|-------|-------|
|           |               | 1               | 2     | 3     | 4     | 5     |
| 10°       | 0.1           | 100%            | -     | -     | -     | -     |
|           | 0.2           | 100%            | -     | -     | -     | -     |
|           | 0.3           | 100%            | -     | -     | -     | -     |
|           | 0.4           | 100%            | -     | -     | -     | -     |
| 30°       | 0.1           | 33.3%           | 66.7% | -     | -     | -     |
|           | 0.2           | -               | -     | 100%  | -     | -     |
|           | 0.3           | 16.7%           | 83.3% | -     | -     | -     |
|           | 0.4           | 100%            | -     | -     | -     | -     |
| 50°       | 0.1           | -               | -     | 66.7% | 33.3% | -     |
|           | 0.2           | -               | -     | -     | 66.7% | 33.3% |
|           | 0.3           | -               | 16.7% | 83.3% | -     | -     |
|           | 0.4           | 100%            | -     | -     | -     | -     |
| 70°       | 0.1           | -               | -     | 100%  | -     | -     |
|           | 0.2           | -               | -     | -     | 100%  | -     |
|           | 0.3           | -               | 66.7% | 33.3% | -     | -     |
|           | 0.4           | 100%            | -     | -     | -     | -     |
| 90°       | 0.1           | -               | -     | 100%  | -     | -     |
|           | 0.2           | -               | 100%  | -     | -     | -     |
|           | 0.3           | -               | 100%  | -     | -     | -     |
|           | 0.4           | 100%            | -     | -     | -     | -     |
